# Supplementary material
Source: PubMed Central journal article supplement (PMC9330296)

## Supplemental Online Content

Kolte D, Bhardwaj B, Lu M, et al. Association between early left ventricular ejection fraction improvement after transcatheter aortic valve replacement and 5-year clinical outcomes. *JAMA Cardiol*. Published online July 27, 2022. doi:10.1001/jamacardio.2022.2222

**eFigure 1.** Early LVEF Improvement After TAVR in Patients With Severe AS and Baseline LVEF <50%

**eFigure 2.** Composite of All-Cause Death or Rehospitalization and Cardiac Death or Rehospitalization at 5 Years in Patients With vs. Without Early LVEF Improvement After TAVR

**eFigure 3.** NYHA Functional Class in Patients With vs. Without Early LVEF Improvement After TAVR

**eFigure 4.** KCCQ-OS in Patients With vs. Without Early LVEF Improvement After TAVR

**eFigure 5.** Association Between  $\Delta$ LVEF and 5-Year All-Cause Mortality After TAVR

**eFigure 6.** 5-Year Clinical Outcomes in Patients With vs. Without LVEF Improvement at 1 Year After TAVR

**eFigure 7.** 5-Year Outcomes in Men and Women With vs. Without Early LVEF Improvement After TAVR

**eTable 1.** Baseline Characteristics of Men With vs. Without Early LVEF Improvement Following TAVR

**eTable 2.** Baseline Characteristics of Women With vs. Without Early LVEF Improvement Following TAVR

**eTable 3.** Baseline Characteristics of Men vs. Women Without Early LVEF Improvement Following TAVR

**eTable 4.** Baseline Characteristics of Men vs. Women With Early LVEF Improvement Following TAVR

**eTable 5.** Predictors of Degree of LVEF Improvement ( $\Delta$ LVEF) After TAVR

**eTable 6.** Adjusted Association Between LVEF Improvement at 1 Year and 5-Year Clinical Outcomes After TAVR

**eTable 7.** Association Between Early LVEF Improvement and 5-Year Outcomes After TAVR by Sex

This supplemental material has been provided by the authors to give readers additional information about their work

**eTable 1.** Baseline Characteristics of Men With vs. Without Early LVEF Improvement Following TAVR

|                                        | No LVEF Improvement<br>(n=339) | With LVEF Improvement<br>(n=129) | P Value |
|----------------------------------------|--------------------------------|----------------------------------|---------|
| Age, years                             | 81.8±7.9                       | 82.7±7.5                         | 0.25    |
| White                                  | 292/339 (86.1%)                | 116/129 (89.9%)                  | 0.35    |
| BMI, kg/m <sup>2</sup>                 | 27.2±5.0                       | 27.7±6.1                         | 0.41    |
| STS Score                              | 7.7±4.1                        | 8.4±4.2                          | 0.077   |
| NYHA Class III/IV                      | 292/339 (86.1%)                | 116/129 (89.9%)                  | 0.35    |
| Hypertension                           | 316/339 (93.2%)                | 113/129 (87.6%)                  | 0.06    |
| Diabetes Mellitus                      | 136/339 (40.1%)                | 48/129 (37.2%)                   | 0.60    |
| CAD                                    | 301/339 (88.8%)                | 110/129 (85.3%)                  | 0.34    |
| Prior MI                               | 129/339 (38.1%)                | 30/129 (23.3%)                   | 0.003   |
| Prior PCI                              | 140/338 (41.4%)                | 47/129 (36.4%)                   | 0.34    |
| Prior CABG                             | 177/339 (52.2%)                | 56/129 (43.4%)                   | 0.10    |
| Prior BAV                              | 45/339 (13.3%)                 | 16/129 (12.4%)                   | 0.88    |
| Atrial Fibrillation                    | 146/318 (45.9%)                | 41/103 (39.8%)                   | 0.31    |
| CVA                                    | 24/339 (7.1%)                  | 13/129 (10.1%)                   | 0.34    |
| PAD                                    | 112/339 (33.0%)                | 35/129 (27.1%)                   | 0.27    |
| CKD (S. Creatinine >2 mg/dL)           | 53/338 (15.7%)                 | 14/129 (10.9%)                   | 0.24    |
| COPD                                   | 126/339 (37.2%)                | 46/129 (35.7%)                   | 0.83    |
| O2 Dependent Lung Disease              | 9/339 (2.7%)                   | 7/129 (5.4%)                     | 0.16    |
| Cancer                                 | 109/339 (32.2%)                | 26/129 (20.2%)                   | 0.012   |
| Katz Activities of Daily Living Index  | 5.7±0.8 (311)                  | 5.4±1.1 (102)                    | 0.047   |
| Hemoglobin, g/dL                       | 12.8±7.3 (339)                 | 12.3±1.5 (129)                   | 0.29    |
| Albumin <3.5 g/dL                      | 67/319 (21.0%)                 | 32/112 (28.6%)                   | 0.12    |
| <b>Baseline Echocardiographic Data</b> |                                |                                  |         |
| LVEF, %                                | 38.1±8.5                       | 34.5±8.9                         | <0.001  |

|                                                     |                 |                  |       |
|-----------------------------------------------------|-----------------|------------------|-------|
| LV Mass, g                                          | 275.8±82.2      | 267.1±72.7       | 0.28  |
| LV Mass Index, g/m <sup>2</sup>                     | 138.8±38.0      | 136.6±35.8       | 0.59  |
| LVEDD, cm                                           | 5.4±0.8         | 5.2±0.7          | 0.007 |
| LVESD, cm                                           | 4.4±0.9         | 4.2±0.7          | 0.08  |
| AV Peak Velocity, cm/s                              | 399.7±56.9      | 400.7±64.2       | 0.88  |
| AV Mean Gradient, mmHg                              | 38.5±11.3       | 39.1±12.1        | 0.61  |
| AV Area, cm <sup>2</sup>                            | 0.7±0.2         | 0.7±0.2          | 0.17  |
| LVOT Doppler Stroke Volume, mL                      | 63.2±16.4       | 60.8±18.4        | 0.19  |
| LVOT Doppler Stroke Volume Index, mL/m <sup>2</sup> | 31.9±8.2        | 31.0±8.8         | 0.28  |
| ≥Moderate AR                                        | 33/329 (10.0%)  | 12/125 (9.6%)    | >0.99 |
| ≥Moderate MR                                        | 82/322 (25.5%)  | 25/123 (20.3%)   | 0.27  |
| <b>Procedural Characteristics</b>                   |                 |                  |       |
| Valve size (mm)                                     |                 |                  | 0.022 |
| 20                                                  | 0/339 (0.0%)    | 0/129 (0.0%)     |       |
| 23                                                  | 22/339 (6.5%)   | 18/129 (14.0%)   |       |
| 26                                                  | 194/339 (57.2%) | 75/129 (58.1%)   |       |
| 29                                                  | 123/339 (36.3%) | 36/129 (27.9%)   |       |
| Valve type                                          |                 |                  | 0.005 |
| Sapien                                              | 61/339 (18.0%)  | 35/129 (27.1%)   |       |
| Sapien XT                                           | 108/339 (31.9%) | 50/129 (38.8%)   |       |
| Sapien 3                                            | 170/339 (50.1%) | 44/129 (34.1%)   |       |
| Pre-dilation                                        | 332/337 (98.5%) | 129/129 (100.0%) | 0.33  |
| Post-dilation                                       | 69/337 (20.5%)  | 38/127 (29.9%)   | 0.036 |
| Concomitant PCI                                     | 3/272 (1.1%)    | 2/107 (1.9%)     | 0.62  |
| Need for 2 <sup>nd</sup> THV                        | 7/339 (2.1%)    | 1/129 (0.8%)     | 0.45  |
| <b>Discharge Medications</b>                        |                 |                  |       |
| Beta Blocker                                        | 247/339 (72.9%) | 97/129 (75.2%)   | 0.64  |

|                                                |                 |                |        |
|------------------------------------------------|-----------------|----------------|--------|
| ACE Inhibitor/ARB                              | 181/339 (53.4%) | 72/129 (55.8%) | 0.68   |
| <b>Procedural Complications Within 30 Days</b> |                 |                |        |
| PPM                                            | 31/339 (9.1%)   | 7/129 (5.4%)   | 0.26   |
| New Atrial Fibrillation                        | 18/339 (5.3%)   | 6/129 (4.7%)   | >0.99  |
| >Mild PVL                                      | 32/333 (9.6%)   | 12/127 (9.4%)  | >0.99  |
| <b>30-Day Post-TAVR Echocardiographic Data</b> |                 |                |        |
| AV Mean Gradient, mmHg                         | 9.2±3.6 (337)   | 9.5±3.3 (129)  | 0.39   |
| Severe Prosthesis-Patient Mismatch*            | 42/326 (12.9%)  | 12/123 (9.8%)  | 0.42   |
| ΔLVEF (30 Day Change from Baseline), %         | 1.0±5.3         | 16.3±6.0       | <0.001 |

BMI = body mass index; NYHA = New York Heart Association; CAD = coronary artery disease; MI = myocardial infarction; PCI = percutaneous coronary intervention; CABG = coronary artery bypass grafting; BAV = balloon aortic valvuloplasty; CVA = cerebrovascular accident; PAD = peripheral artery disease; CKD = chronic kidney disease; COPD = chronic obstructive pulmonary disease; LVEF = left ventricular ejection fraction; AV = aortic valve; LVEDD = left ventricular end-diastolic diameter; LVESD = left ventricular end-systolic diameter; LVOT = left ventricular outflow tract; AR = aortic regurgitation; MR = mitral regurgitation; THV = transcatheter heart valve; ACE = angiotensin converting enzyme; ARB = angiotensin II receptor blocker; PPM = permanent pacemaker; PVL = paravalvular leak.

\*defined as indexed effective orifice area <0.65 cm<sup>2</sup>/m<sup>2</sup>.

**eTable 2.** Baseline Characteristics of Women With vs. Without Early LVEF Improvement Following TAVR

|                                        | No LVEF Improvement<br>(n=104) | LVEF Improvement<br>(n=87) | P Value |
|----------------------------------------|--------------------------------|----------------------------|---------|
| Age, years                             | 83.1±7.6                       | 83.9±7.1                   | 0.48    |
| White                                  | 85/98 (86.7%)                  | 75/83 (90.4%)              | 0.49    |
| BMI, kg/m <sup>2</sup>                 | 28.1±7.3                       | 27.7±7.3                   | 0.70    |
| STS Score                              | 9.3±5.2                        | 9.6±4.7                    | 0.64    |
| NYHA Class III/IV                      | 90/104 (86.5%)                 | 81/87 (93.1%)              | 0.16    |
| Hypertension                           | 93/104 (89.4%)                 | 76/87 (87.4%)              | 0.66    |
| Diabetes Mellitus                      | 38/104 (36.5%)                 | 23/87 (26.4%)              | 0.16    |
| CAD                                    | 66/104 (63.5%)                 | 52/87 (59.8%)              | 0.65    |
| Prior MI                               | 25/104 (24.0%)                 | 16/87 (18.4%)              | 0.38    |
| Prior PCI                              | 23/104 (22.1%)                 | 26/87 (29.9%)              | 0.25    |
| Prior CABG                             | 13/104 (12.5%)                 | 5/87 (5.7%)                | 0.14    |
| Prior BAV                              | 15/104 (14.4%)                 | 12/87 (13.8%)              | >0.99   |
| Atrial Fibrillation                    | 39/98 (39.8%)                  | 16/72 (22.2%)              | 0.02    |
| CVA                                    | 13/104 (12.5%)                 | 7/87 (8.0%)                | 0.35    |
| PAD                                    | 25/104 (24.0%)                 | 15/87 (17.2%)              | 0.29    |
| CKD (S. Creatinine >2 mg/dL)           | 10/104 (9.6%)                  | 7/87 (8.0%)                | 0.80    |
| COPD                                   | 19/104 (18.3%)                 | 27/87 (31.0%)              | 0.043   |
| O2 Dependent Lung Disease              | 4/104 (3.8%)                   | 3/87 (3.4%)                | >0.99   |
| Cancer                                 | 37/104 (35.6%)                 | 23/87 (26.4%)              | 0.21    |
| Katz Activities of Daily Living Index  | 5.2±1.4                        | 4.9±1.5                    | 0.14    |
| Hemoglobin, g/dL                       | 11.6±1.5                       | 11.4±1.5                   | 0.36    |
| Albumin <3.5 g/dL                      | 21/99 (21.2%)                  | 14/72 (19.4%)              | 0.85    |
| <b>Baseline Echocardiographic Data</b> |                                |                            |         |
| LVEF, %                                | 41.0±7.6                       | 37.3±9.2                   | 0.003   |

|                                                     |                 |               |       |
|-----------------------------------------------------|-----------------|---------------|-------|
| LV Mass, g                                          | 237.8±74.1      | 250.8±75.6    | 0.25  |
| LV Mass Index, g/m <sup>2</sup>                     | 141.0±44.1      | 147.2±44.9    | 0.35  |
| LVEDD, cm                                           | 4.7±0.7         | 4.7±0.7       | 0.65  |
| LVESD, cm                                           | 3.6±0.8         | 3.7±0.8       | 0.30  |
| AV Peak Velocity, cm/s                              | 427.3±67.6      | 445.8±73.9    | 0.08  |
| AV Mean Gradient, mmHg                              | 43.9±15.4       | 48.8±17.1     | 0.041 |
| AV Area, cm <sup>2</sup>                            | 0.6±0.1         | 0.5±0.2       | 0.052 |
| LVOT Doppler Stroke Volume, mL                      | 58.0±13.0       | 55.4±15.6     | 0.21  |
| LVOT Doppler Stroke Volume Index, mL/m <sup>2</sup> | 34.1±7.8        | 32.2±8.2      | 0.10  |
| ≥Moderate AR                                        | 8/102 (7.8%)    | 11/85 (12.9%) | 0.33  |
| ≥Moderate MR                                        | 38/102 (37.3%)  | 29/86 (33.7%) | 0.65  |
| <b>Procedural Characteristics</b>                   |                 |               |       |
| Valve size (mm)                                     |                 |               | 0.06  |
| 20                                                  | 7/104 (6.7%)    | 1/87 (1.1%)   |       |
| 23                                                  | 59/104 (56.7%)  | 63/87 (72.4%) |       |
| 26                                                  | 35/104 (33.7%)  | 22/87 (25.3%) |       |
| 29                                                  | 3/104 (2.9%)    | 1/87 (1.1%)   |       |
| Valve type                                          |                 |               | 0.35  |
| Sapien                                              | 23/104 (22.1%)  | 27/87 (31.0%) |       |
| Sapien XT                                           | 46/104 (44.2%)  | 36/87 (41.4%) |       |
| Sapien 3                                            | 35/104 (33.7%)  | 24/87 (27.6%) |       |
| Pre-dilation                                        | 103/104 (99.0%) | 85/87 (97.7%) | 0.59  |
| Post-dilation                                       | 19/104 (18.3%)  | 16/86 (18.6%) | >0.99 |
| Concomitant PCI                                     | 0/71 (0.0%)     | 1/59 (1.7%)   | 0.45  |
| Need for 2 <sup>nd</sup> THV                        | 0/104 (0.0%)    | 0/87 (0.0%)   | >0.99 |
| <b>Discharge Medications</b>                        |                 |               |       |
| Beta Blocker                                        | 70/104 (67.3%)  | 59/87 (67.8%) | >0.99 |

|                                                |                |               |        |
|------------------------------------------------|----------------|---------------|--------|
| ACE Inhibitor/ARB                              | 53/104 (51.0%) | 43/87 (49.4%) | 0.88   |
| <b>Procedural Complications Within 30 Days</b> |                |               |        |
| PPM                                            | 5/104 (4.8%)   | 4/87 (4.6%)   | >0.99  |
| New Atrial Fibrillation                        | 3/104 (2.9%)   | 3/87 (3.4%)   | >0.99  |
| >Mild PVL                                      | 7/101 (6.9%)   | 7/86 (8.1%)   | 0.79   |
| <b>30-Day Post-TAVR Echocardiographic Data</b> |                |               |        |
| AV Mean Gradient, mmHg                         | 11.0±4.8       | 11.0±3.4      | >0.99  |
| Severe Prosthesis-Patient Mismatch*            | 21/103 (20.4%) | 10/85 (11.8%) | 0.12   |
| ΔLVEF (30 Day Change from Baseline), %         | 1.4±5.5        | 16.6±5.1      | <0.001 |

BMI = body mass index; NYHA = New York Heart Association; CAD = coronary artery disease; MI = myocardial infarction; PCI = percutaneous coronary intervention; CABG = coronary artery bypass grafting; BAV = balloon aortic valvuloplasty; CVA = cerebrovascular accident; PAD = peripheral artery disease; CKD = chronic kidney disease; COPD = chronic obstructive pulmonary disease; LVEF = left ventricular ejection fraction; AV = aortic valve; LVEDD = left ventricular end-diastolic diameter; LVESD = left ventricular end-systolic diameter; LVOT = left ventricular outflow tract; AR = aortic regurgitation; MR = mitral regurgitation; THV = transcatheter heart valve; ACE = angiotensin converting enzyme; ARB = angiotensin II receptor blocker; PPM = permanent pacemaker; PVL = paravalvular leak.

\*defined as indexed effective orifice area <0.65 cm<sup>2</sup>/m<sup>2</sup>.

**eTable 3.** Baseline Characteristics of Men vs. Women Without Early LVEF Improvement Following TAVR

|                                        | <b>Men<br/>(n=339)</b> | <b>Women<br/>(n=104)</b> | <b>P Value</b> |
|----------------------------------------|------------------------|--------------------------|----------------|
| Age, years                             | 81.8±7.9               | 83.1±7.6                 | 0.11           |
| White                                  | 314/333 (94.3%)        | 85/98 (86.7%)            | 0.03           |
| BMI, kg/m <sup>2</sup>                 | 27.2±5.0               | 28.1±7.3                 | 0.25           |
| STS Score                              | 7.7±4.1                | 9.3±5.2                  | 0.004          |
| NYHA Class III/IV                      | 292/339 (86.1%)        | 90/104 (86.5%)           | >0.99          |
| Hypertension                           | 316/339 (93.2%)        | 93/104 (89.4%)           | 0.21           |
| Diabetes Mellitus                      | 136/339 (40.1%)        | 38/104 (36.5%)           | 0.57           |
| CAD                                    | 301/339 (88.8%)        | 66/104 (63.5%)           | <0.001         |
| Prior MI                               | 129/339 (38.1%)        | 25/104 (24.0%)           | 0.01           |
| Prior PCI                              | 140/338 (41.4%)        | 23/104 (22.1%)           | <0.001         |
| Prior CABG                             | 177/339 (52.2%)        | 13/104 (12.5%)           | <0.001         |
| Prior BAV                              | 45/339 (13.3%)         | 15/104 (14.4%)           | 0.75           |
| Atrial Fibrillation                    | 146/318 (45.9%)        | 39/98 (39.8%)            | 0.30           |
| CVA                                    | 24/339 (7.1%)          | 13/104 (12.5%)           | 0.10           |
| PAD                                    | 112/339 (33.0%)        | 25/104 (24.0%)           | 0.09           |
| CKD (S. Creatinine >2 mg/dL)           | 53/338 (15.7%)         | 10/104 (9.6%)            | 0.15           |
| COPD                                   | 126/339 (37.2%)        | 19/104 (18.3%)           | <0.001         |
| O2 Dependent Lung Disease              | 9/339 (2.7%)           | 4/104 (3.8%)             | 0.51           |
| Cancer                                 | 109/339 (32.2%)        | 37/104 (35.6%)           | 0.55           |
| Katz Activities of Daily Living Index  | 5.7±0.8 (311)          | 5.2±1.4                  | 0.003          |
| Hemoglobin, g/dL                       | 12.8±7.3 (339)         | 11.6±1.5                 | 0.005          |
| Albumin <3.5 g/dL                      | 67/319 (21.0%)         | 21/99 (21.2%)            | >0.99          |
| <b>Baseline Echocardiographic Data</b> |                        |                          |                |
| LVEF, %                                | 38.1±8.5               | 41.0±7.6                 | 0.001          |



|                                                     |                 |                 |        |
|-----------------------------------------------------|-----------------|-----------------|--------|
| LV Mass, g                                          | 275.8±82.2      | 237.8±74.1      | <0.001 |
| LV Mass Index, g/m <sup>2</sup>                     | 138.8±38.0      | 141.0±44.1      | 0.66   |
| LVEDD, cm                                           | 5.4±0.8         | 4.7±0.7         | <0.001 |
| LVESD, cm                                           | 4.4±0.9         | 3.6±0.8         | <0.001 |
| AV Peak Velocity, cm/s                              | 399.7±56.9      | 427.3±67.6      | <0.001 |
| AV Mean Gradient, mmHg                              | 38.5±11.3       | 43.9±15.4       | 0.001  |
| AV Area, cm <sup>2</sup>                            | 0.7±0.2         | 0.6±0.1         | <0.001 |
| LVOT Doppler Stroke Volume, mL                      | 63.2±16.4       | 58.0±13.0       | 0.001  |
| LVOT Doppler Stroke Volume Index, mL/m <sup>2</sup> | 31.9±8.2        | 34.1±7.8        | 0.016  |
| ≥Moderate AR                                        | 33/329 (10.0%)  | 8/102 (7.8%)    | 0.57   |
| ≥Moderate MR                                        | 82/322 (25.5%)  | 38/102 (37.3%)  | 0.024  |
| <b>Procedural Characteristics</b>                   |                 |                 |        |
| Valve size (mm)                                     |                 |                 | <0.001 |
| 20                                                  | 0/339 (0.0%)    | 7/104 (6.7%)    |        |
| 23                                                  | 22/339 (6.5%)   | 59/104 (56.7%)  |        |
| 26                                                  | 194/339 (57.2%) | 35/104 (33.7%)  |        |
| 29                                                  | 123/339 (36.3%) | 3/104 (2.9%)    |        |
| Valve type                                          |                 |                 | 0.010  |
| Sapien                                              | 61/339 (18.0%)  | 23/104 (22.1%)  |        |
| Sapien XT                                           | 108/339 (31.9%) | 46/104 (44.2%)  |        |
| Sapien 3                                            | 170/339 (50.1%) | 35/104 (33.7%)  |        |
| Pre-dilation                                        | 332/337 (98.5%) | 103/104 (99.0%) | >0.99  |
| Post-dilation                                       | 69/337 (20.5%)  | 19/104 (18.3%)  | 0.68   |
| Concomitant PCI                                     | 3/272 (1.1%)    | 0/71 (0.0%)     | >0.99  |
| Need for 2 <sup>nd</sup> THV                        | 7/339 (2.1%)    | 0/104 (0.0%)    | 0.21   |
| <b>Discharge Medications</b>                        |                 |                 |        |
| Beta Blocker                                        | 247/339 (72.9%) | 70/104 (67.3%)  | 0.32   |

|                                                |                 |                |        |
|------------------------------------------------|-----------------|----------------|--------|
| ACE Inhibitor/ARB                              | 181/339 (53.4%) | 53/104 (51.0%) | 0.74   |
| <b>Procedural Complications Within 30 Days</b> |                 |                |        |
| PPM                                            | 31/339 (9.1%)   | 5/104 (4.8%)   | 0.22   |
| New Atrial Fibrillation                        | 18/339 (5.3%)   | 3/104 (2.9%)   | 0.43   |
| >Mild PVL                                      | 32/333 (9.6%)   | 7/101 (6.9%)   | 0.55   |
| <b>30-Day Post-TAVR Echocardiographic Data</b> |                 |                |        |
| AV Mean Gradient, mmHg                         | 9.2±3.6 (337)   | 11.0±4.8       | <0.001 |
| Severe Prosthesis-Patient Mismatch*            | 42/326 (12.9%)  | 21/103 (20.4%) | 0.08   |
| ΔLVEF (30 Day Change from Baseline), %         | 1.0±5.3         | 1.4±5.5        | 0.61   |

BMI = body mass index; NYHA = New York Heart Association; CAD = coronary artery disease; MI = myocardial infarction; PCI = percutaneous coronary intervention; CABG = coronary artery bypass grafting; BAV = balloon aortic valvuloplasty; CVA = cerebrovascular accident; PAD = peripheral artery disease; CKD = chronic kidney disease; COPD = chronic obstructive pulmonary disease; LVEF = left ventricular ejection fraction; AV = aortic valve; LVEDD = left ventricular end-diastolic diameter; LVESD = left ventricular end-systolic diameter; LVOT = left ventricular outflow tract; AR = aortic regurgitation; MR = mitral regurgitation; THV = transcatheter heart valve; ACE = angiotensin converting enzyme; ARB = angiotensin II receptor blocker; PPM = permanent pacemaker; PVL = paravalvular leak.

\*defined as indexed effective orifice area <0.65 cm<sup>2</sup>/m<sup>2</sup>.

**eTable 4.** Baseline Characteristics of Men vs. Women With Early LVEF Improvement Following TAVR

|                                        | <b>Men<br/>(n=129)</b> | <b>Women<br/>(n=87)</b> | <b>P Value</b> |
|----------------------------------------|------------------------|-------------------------|----------------|
| Age, years                             | 82.7±7.5               | 83.9±7.1                | 0.23           |
| White                                  | 117/126 (92.9%)        | 75/83 (90.4%)           | 0.61           |
| BMI, kg/m <sup>2</sup>                 | 27.7±6.1               | 27.7±7.3                | 0.98           |
| STS Score                              | 8.4±4.2                | 9.6±4.7                 | 0.06           |
| NYHA Class III/IV                      | 116/129 (89.9%)        | 81/87 (93.1%)           | 0.47           |
| Hypertension                           | 113/129 (87.6%)        | 76/87 (87.4%)           | >0.99          |
| Diabetes Mellitus                      | 48/129 (37.2%)         | 23/87 (26.4%)           | 0.11           |
| CAD                                    | 110/129 (85.3%)        | 52/87 (59.8%)           | <0.001         |
| Prior MI                               | 30/129 (23.3%)         | 16/87 (18.4%)           | 0.50           |
| Prior PCI                              | 47/129 (36.4%)         | 26/87 (29.9%)           | 0.38           |
| Prior CABG                             | 56/129 (43.4%)         | 5/87 (5.7%)             | <0.001         |
| Prior BAV                              | 16/129 (12.4%)         | 12/87 (13.8%)           | 0.84           |
| Atrial Fibrillation                    | 41/103 (39.8%)         | 16/72 (22.2%)           | 0.021          |
| CVA                                    | 13/129 (10.1%)         | 7/87 (8.0%)             | 0.81           |
| PAD                                    | 35/129 (27.1%)         | 15/87 (17.2%)           | 0.10           |
| CKD (S. Creatinine >2 mg/dL)           | 14/129 (10.9%)         | 7/87 (8.0%)             | 0.64           |
| COPD                                   | 46/129 (35.7%)         | 27/87 (31.0%)           | 0.56           |
| O2 Dependent Lung Disease              | 7/129 (5.4%)           | 3/87 (3.4%)             | 0.74           |
| Cancer                                 | 26/129 (20.2%)         | 23/87 (26.4%)           | 0.32           |
| Katz Activities of Daily Living Index  | 5.4±1.1 (102)          | 4.9±1.5                 | 0.009          |
| Hemoglobin, g/dL                       | 12.3±1.5 (129)         | 11.4±1.5                | <0.001         |
| Albumin <3.5 g/dL                      | 32/112 (28.6%)         | 14/72 (19.4%)           | 0.22           |
| <b>Baseline Echocardiographic Data</b> |                        |                         |                |
| LVEF, %                                | 34.5±8.9               | 37.3±9.2                | 0.031          |

|                                                     |                  |               |        |
|-----------------------------------------------------|------------------|---------------|--------|
| LV Mass, g                                          | 267.1±72.7       | 250.8±75.6    | 0.13   |
| LV Mass Index, g/m <sup>2</sup>                     | 136.6±35.8       | 147.2±44.9    | 0.08   |
| LVEDD, cm                                           | 5.2±0.7          | 4.7±0.7       | <0.001 |
| LVESD, cm                                           | 4.2±0.7          | 3.7±0.8       | <0.001 |
| AV Peak Velocity, cm/s                              | 400.7±64.2       | 445.8±73.9    | <0.001 |
| AV Mean Gradient, mmHg                              | 39.1±12.1        | 48.8±17.1     | <0.001 |
| AV Area, cm <sup>2</sup>                            | 0.7±0.2          | 0.5±0.2       | <0.001 |
| LVOT Doppler Stroke Volume, mL                      | 60.8±18.4        | 55.4±15.6     | 0.023  |
| LVOT Doppler Stroke Volume Index, mL/m <sup>2</sup> | 31.0±8.8         | 32.2±8.2      | 0.31   |
| ≥Moderate AR                                        | 12/125 (9.6%)    | 11/85 (12.9%) | 0.50   |
| ≥Moderate MR                                        | 25/123 (20.3%)   | 29/86 (33.7%) | 0.037  |
| <b>Procedural Characteristics</b>                   |                  |               |        |
| Valve size (mm)                                     |                  |               | <0.001 |
| 20                                                  | 0/129 (0.0%)     | 1/87 (1.1%)   |        |
| 23                                                  | 18/129 (14.0%)   | 63/87 (72.4%) |        |
| 26                                                  | 75/129 (58.1%)   | 22/87 (25.3%) |        |
| 29                                                  | 36/129 (27.9%)   | 1/87 (1.1%)   |        |
| Valve type                                          |                  |               | 0.59   |
| Sapien                                              | 35/129 (27.1%)   | 27/87 (31.0%) |        |
| Sapien XT                                           | 50/129 (38.8%)   | 36/87 (41.4%) |        |
| Sapien 3                                            | 44/129 (34.1%)   | 24/87 (27.6%) |        |
| Pre-dilation                                        | 129/129 (100.0%) | 85/87 (97.7%) | 0.16   |
| Post-dilation                                       | 38/127 (29.9%)   | 16/86 (18.6%) | 0.08   |
| Concomitant PCI                                     | 2/107 (1.9%)     | 1/59 (1.7%)   | >0.99  |
| Need for 2 <sup>nd</sup> THV                        | 1/129 (0.8%)     | 0/87 (0.0%)   | >0.99  |
| <b>Discharge Medications</b>                        |                  |               |        |
| Beta Blocker                                        | 97/129 (75.2%)   | 59/87 (67.8%) | 0.28   |

|                                                |                |               |        |
|------------------------------------------------|----------------|---------------|--------|
| ACE Inhibitor/ARB                              | 72/129 (55.8%) | 43/87 (49.4%) | 0.40   |
| <b>Procedural Complications Within 30 Days</b> |                |               |        |
| PPM                                            | 7/129 (5.4%)   | 4/87 (4.6%)   | >0.99  |
| New Atrial Fibrillation                        | 6/129 (4.7%)   | 3/87 (3.4%)   | 0.74   |
| >Mild PVL                                      | 12/127 (9.4%)  | 7/86 (8.1%)   | 0.81   |
| <b>30-Day Post-TAVR Echocardiographic Data</b> |                |               |        |
| AV Mean Gradient, mmHg                         | 9.5±3.3 (129)  | 11.0±3.4      | <0.001 |
| Severe Prosthesis-Patient Mismatch*            | 12/123 (9.8%)  | 10/85 (11.8%) | 0.65   |
| ΔLVEF (30 Day Change from Baseline), %         | 16.3±6.0       | 16.6±5.1      | 0.67   |

BMI = body mass index; NYHA = New York Heart Association; CAD = coronary artery disease; MI = myocardial infarction; PCI = percutaneous coronary intervention; CABG = coronary artery bypass grafting; BAV = balloon aortic valvuloplasty; CVA = cerebrovascular accident; PAD = peripheral artery disease; CKD = chronic kidney disease; COPD = chronic obstructive pulmonary disease; LVEF = left ventricular ejection fraction; AV = aortic valve; LVEDD = left ventricular end-diastolic diameter; LVESD = left ventricular end-systolic diameter; LVOT = left ventricular outflow tract; AR = aortic regurgitation; MR = mitral regurgitation; THV = transcatheter heart valve; ACE = angiotensin converting enzyme; ARB = angiotensin II receptor blocker; PPM = permanent pacemaker; PVL = paravalvular leak.

\*defined as indexed effective orifice area <0.65 cm<sup>2</sup>/m<sup>2</sup>.

**eTable 5.** Predictors of Degree of LVEF Improvement ( $\Delta$ LVEF) After TAVR

| Characteristic                        | Full Model |       |         | Parsimonious Model |       |         |
|---------------------------------------|------------|-------|---------|--------------------|-------|---------|
|                                       | Estimate   | SE    | P Value | Estimate           | SE    | P Value |
| Age                                   | 0.01       | 0.059 | 0.92    |                    |       |         |
| Male Sex                              | 0.84       | 1.129 | 0.46    |                    |       |         |
| BMI, kg/m <sup>2</sup>                | 0.15       | 0.070 | 0.031   |                    |       |         |
| STS Score                             | -0.03      | 0.107 | 0.76    |                    |       |         |
| NYHA Class III/IV                     | 0.55       | 1.097 | 0.61    |                    |       |         |
| Hypertension                          | -3.61      | 1.239 | 0.004   | -3.87              | 1.147 | <0.001  |
| Diabetes                              | -1.82      | 0.796 | 0.023   | -1.07              | 0.689 | 0.12    |
| CAD                                   | 1.48       | 0.986 | 0.13    |                    |       |         |
| Prior MI                              | -1.44      | 0.826 | 0.08    | -1.65              | 0.736 | 0.025   |
| Prior PCI                             | 1.36       | 0.794 | 0.09    |                    |       |         |
| Prior CABG                            | -1.52      | 0.853 | 0.07    | -1.52              | 0.720 | 0.035   |
| Prior BAV                             | -0.90      | 1.032 | 0.38    |                    |       |         |
| CVA                                   | -1.26      | 1.257 | 0.32    |                    |       |         |
| PAD                                   | -0.53      | 0.787 | 0.50    |                    |       |         |
| CKD (S. Creatinine >2 mg/dL)          | -0.93      | 1.055 | 0.38    |                    |       |         |
| COPD                                  | -0.10      | 0.827 | 0.91    |                    |       |         |
| O <sub>2</sub> Dependent Lung Disease | 2.87       | 1.940 | 0.14    |                    |       |         |
| Cancer                                | -1.76      | 0.766 | 0.022   | -1.51              | 0.721 | 0.037   |
| Hemoglobin                            | -0.06      | 0.207 | 0.76    |                    |       |         |
| Baseline LVEF, %                      | -0.38      | 0.048 | <0.001  | -0.36              | 0.041 | <0.001  |
| LV Mass Index, g/m <sup>2</sup>       | 0.01       | 0.010 | 0.23    |                    |       |         |
| LVEDD, cm                             | -2.90      | 0.621 | <0.001  | -2.79              | 0.460 | <0.001  |
| AV Area, cm <sup>2</sup>              | -4.96      | 2.728 | 0.07    |                    |       |         |

|                                            |       |       |        |      |       |        |
|--------------------------------------------|-------|-------|--------|------|-------|--------|
| LVOT Doppler Stroke Volume Index           | 0.06  | 0.061 | 0.31   |      |       |        |
| ≥Moderate AR                               | -0.52 | 1.177 | 0.66   |      |       |        |
| ≥Moderate MR                               | -0.75 | 0.822 | 0.36   |      |       |        |
| Discharge Medication Beta Blocker          | -0.43 | 0.822 | 0.60   |      |       |        |
| Discharge Medication ACE Inhibitor/ARB     | 0.47  | 0.720 | 0.51   |      |       |        |
| Procedure Complications (≤7 Days)          | 0.02  | 0.956 | 0.99   |      |       |        |
| Post-TAVR AV Mean Gradient                 | 0.38  | 0.109 | <0.001 | 0.39 | 0.087 | <0.001 |
| Severe Prosthesis-Patient Mismatch         | -3.62 | 1.141 | 0.002  |      |       |        |
| Valve Type (SAPIEN 3 vs. SAPIEN/SAPIEN XT) | -1.03 | 0.854 | 0.23   |      |       |        |
| Valve Size                                 | -0.35 | 0.225 | 0.12   |      |       |        |

BMI = body mass index; NYHA = New York Heart Association; CAD = coronary artery disease; MI = myocardial infarction; PCI = percutaneous coronary intervention; CABG = coronary artery bypass grafting; BAV = balloon aortic valvuloplasty; CVA = cerebrovascular accident; PAD = peripheral artery disease; CKD = chronic kidney disease; COPD = chronic obstructive pulmonary disease; LVEF = left ventricular ejection fraction; AV = aortic valve; LVEDD = left ventricular end-diastolic diameter; LVOT = left ventricular outflow tract; AR = aortic regurgitation; MR = mitral regurgitation; ACE = angiotensin converting enzyme; ARB = angiotensin II receptor blocker.

**eTable 6.** Adjusted Association Between LVEF Improvement at 1 Year and 5-Year Clinical Outcomes After TAVR

| Outcome                            | $\Delta$ LVEF (Per 5% Increase) |         | $\uparrow$ LVEF $\geq$ 10%-Points |         |
|------------------------------------|---------------------------------|---------|-----------------------------------|---------|
|                                    | aHR (95% CI)                    | P Value | aHR (95% CI)                      | P Value |
| All-Cause Death                    | 0.84 (0.79- 0.91)               | <0.001  | 0.64 (0.47-0.86)                  | 0.003   |
| Cardiac Death                      | 0.84 (0.76-0.92)                | <0.001  | 0.63 (0.42-0.95)                  | 0.027   |
| Non-Cardiac Death                  | 0.91 (0.81-1.02)                | 0.12    | 0.75 (0.46-1.22)                  | 0.25    |
| Rehospitalization                  | 0.92 (0.83-1.02)                | 0.09    | 0.77 (0.52-1.16)                  | 0.21    |
| Death or Rehospitalization         | 0.88 (0.81-0.94)                | <0.001  | 0.68 (0.51-0.91)                  | 0.011   |
| Cardiac Death or Rehospitalization | 0.89 (0.82-0.97)                | 0.006   | 0.74 (0.53-1.03)                  | 0.07    |

LVEF = left ventricular ejection fraction; aHR = adjusted hazard ratio; CI = confidence interval

Multivariable models adjusted for the following covariates: sex, BMI, STS score, diabetes mellitus, prior MI, cancer, and baseline

LVEF.



**eTable 7.** Association Between Early LVEF Improvement and 5-Year Outcomes After TAVR by Sex

| Outcome                                   | ΔLVEF (Per 5% Increase) |         |             | ↑ LVEF ≥10%-Points |         |             |
|-------------------------------------------|-------------------------|---------|-------------|--------------------|---------|-------------|
|                                           | aHR (95% CI)            | P Value |             | aHR (95% CI)       | P Value |             |
|                                           |                         | Effect  | Interaction |                    | Effect  | Interaction |
| <b>All-Cause Death</b>                    |                         |         | 0.013       |                    |         | 0.004       |
| Men                                       | 1.01 (0.94-1.08)        | 0.88    |             | 1.05 (0.80-1.37)   | 0.73    |             |
| Women                                     | 0.84 (0.75-0.95)        | 0.005   |             | 0.48 (0.31-0.75)   | 0.001   |             |
| <b>Cardiac Death</b>                      |                         |         | 0.08        |                    |         | 0.050       |
| Men                                       | 0.97 (0.88-1.06)        | 0.50    |             | 0.98 (0.68-1.41)   | 0.91    |             |
| Women                                     | 0.81 (0.67-0.96)        | 0.017   |             | 0.44 (0.22-0.88)   | 0.019   |             |
| <b>Non-Cardiac Death</b>                  |                         |         | 0.19        |                    |         | 0.18        |
| Men                                       | 1.01 (0.90-1.14)        | 0.82    |             | 0.97 (0.62-1.54)   | 0.91    |             |
| Women                                     | 0.88 (0.74-1.05)        | 0.17    |             | 0.56 (0.28-1.10)   | 0.09    |             |
| <b>Rehospitalization</b>                  |                         |         | 0.22        |                    |         | 0.15        |
| Men                                       | 1.02 (0.94-1.10)        | 0.70    |             | 1.05 (0.76-1.45)   | 0.76    |             |
| Women                                     | 0.93 (0.82-1.05)        | 0.22    |             | 0.70 (0.45-1.08)   | 0.11    |             |
| <b>Death or Rehospitalization</b>         |                         |         | 0.021       |                    |         | 0.010       |
| Men                                       | 1.03 (0.96-1.09)        | 0.43    |             | 1.08 (0.85-1.38)   | 0.54    |             |
| Women                                     | 0.89 (0.80-0.99)        | 0.026   |             | 0.60 (0.41-0.87)   | 0.007   |             |
| <b>Cardiac Death or Rehospitalization</b> |                         |         | 0.044       |                    |         | 0.025       |
| Men                                       | 1.04 (0.97-1.11)        | 0.30    |             | 1.16 (0.89-1.52)   | 0.26    |             |
| Women                                     | 0.90 (0.81-1.01)        | 0.08    |             | 0.66 (0.44-1.00)   | 0.049   |             |

LVEF = left ventricular ejection fraction; aHR = adjusted hazard ratio; CI = confidence interval; STS = Society of Thoracic Surgeons;

AVA = aortic valve area; AV = aortic valve; AR = aortic regurgitation; MR = mitral regurgitation.

**eFigure 1.** Early LVEF Improvement After TAVR in Patients With Severe AS and Baseline LVEF <50%

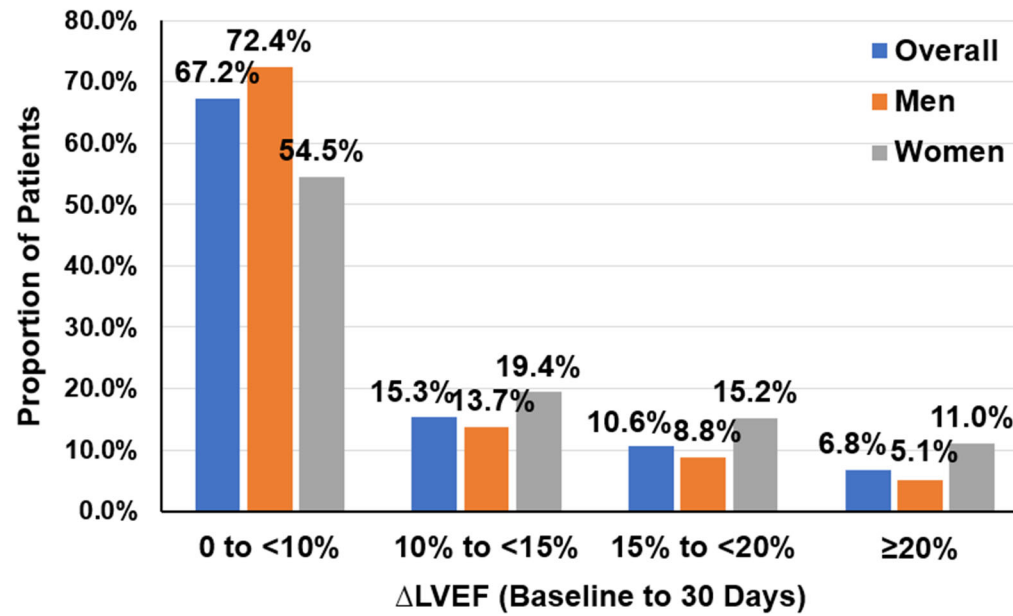

ΔLVEF is expressed as %-point improvement in LVEF between baseline and 30 days after TAVR.

**eFigure 2.** Composite of All-Cause Death or Rehospitalization and Cardiac Death or Rehospitalization at 5 Years in Patients With vs. Without Early LVEF Improvement After TAVR

Time-to-event curves of the composite of all-cause death or rehospitalization (A), and cardiac death or rehospitalization (E) over 5 years after TAVR in patients with vs. without LVEF improvement (defined as  $\geq 10\%$ -point increase over baseline LVEF at 30 days).

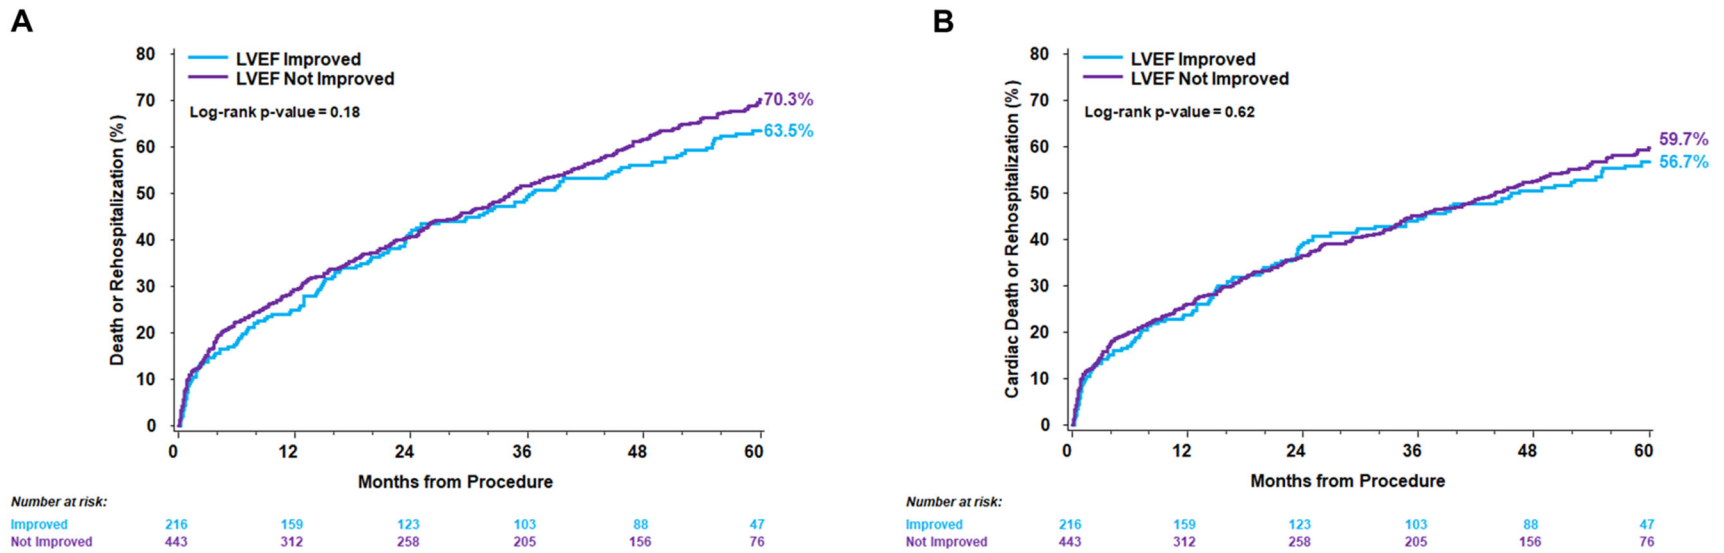

**eFigure 3.** NYHA Functional Class in Patients With vs. Without Early LVEF Improvement After TAVR

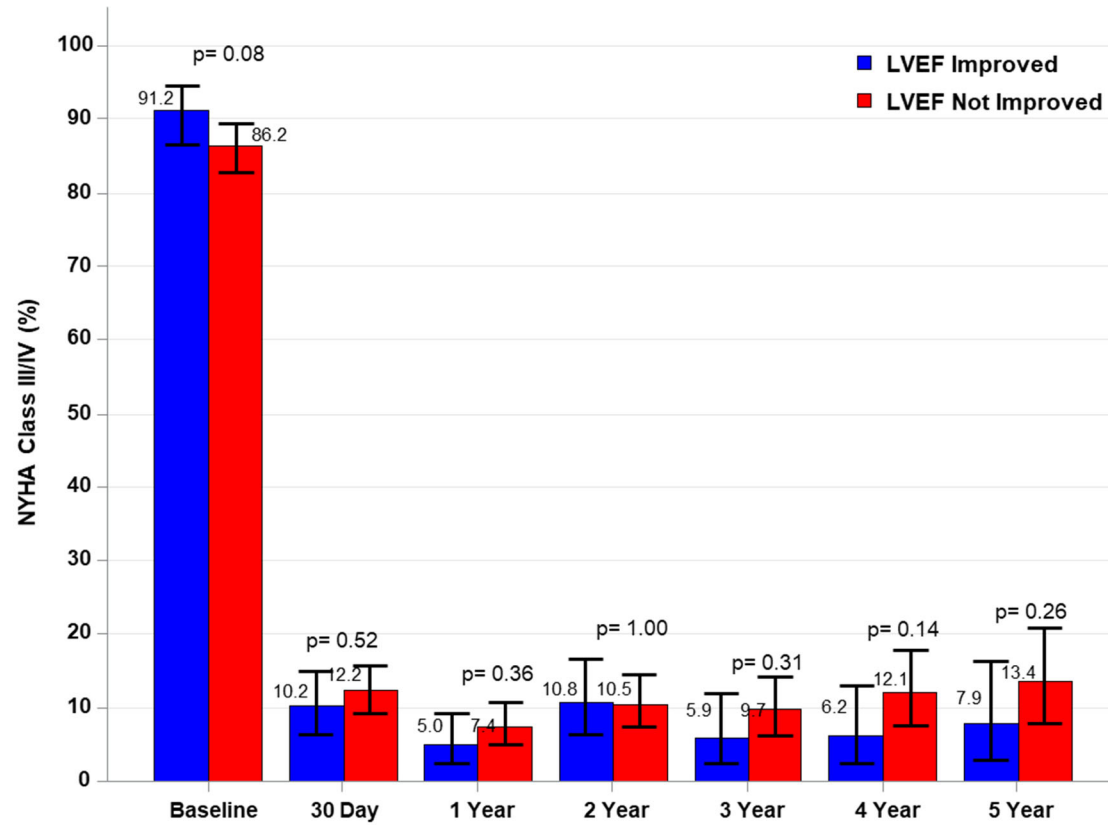

**eFigure 4.** KCCQ-OS in Patients With vs. Without Early LVEF Improvement After TAVR

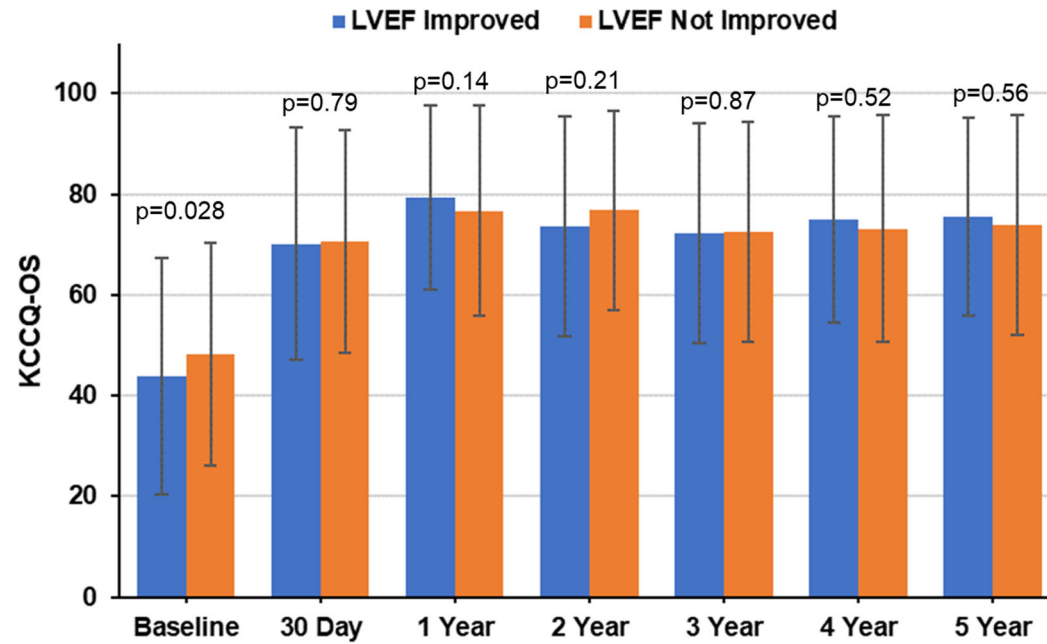

**eFigure 5.** Association Between  $\Delta$ LVEF and 5-Year All-Cause Mortality After TAVR

Restricted cubic spline curve depicting LVEF improvement as a continuous variable (defined as degree of LVEF improvement [ $\Delta$ LVEF] between baseline and 30 days) on the X-axis and the relative hazard of 5-year mortality on the Y-axis. A visual inflection point is seen at  $\Delta$ LVEF=10% beyond which there is a steep decline in the risk of mortality with increasing degree of LVEF improvement.

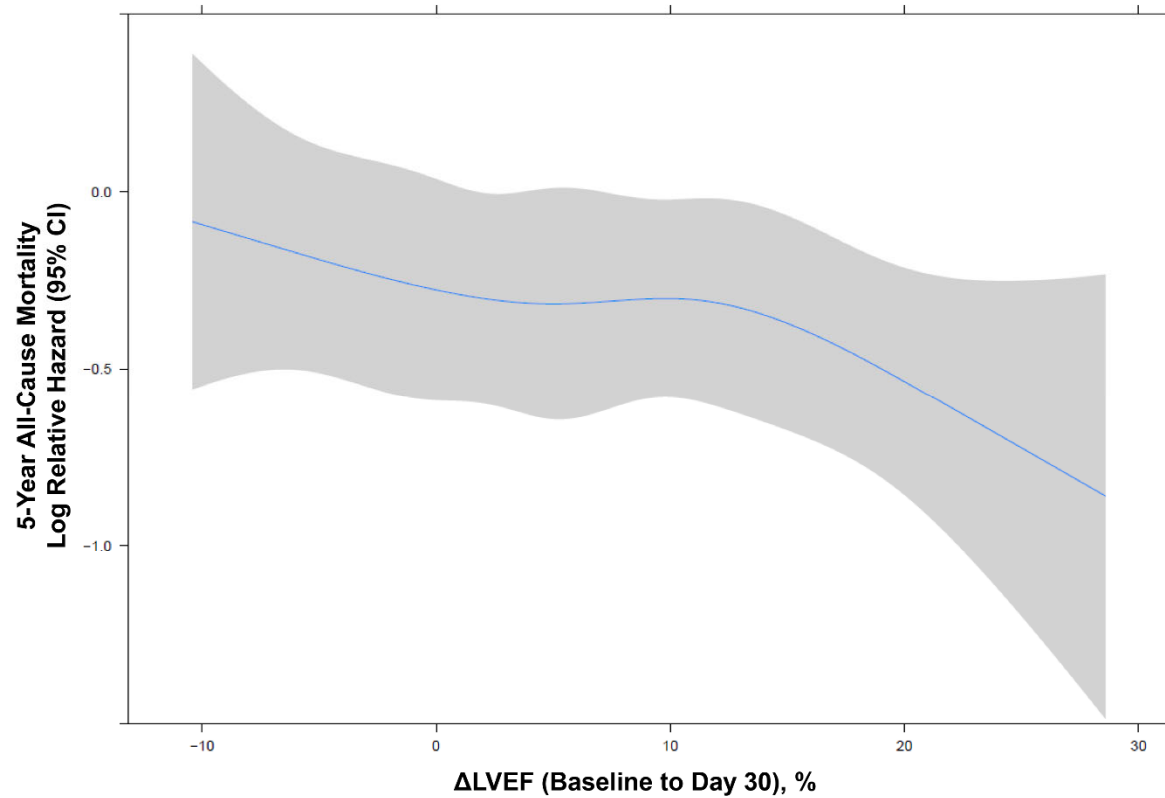

**eFigure 6.** 5-Year Clinical Outcomes in Patients With vs. Without LVEF Improvement at 1 Year After TAVR

Time-to-event curves of 5-year all-cause death (A), cardiac death (B), all-cause death or rehospitalization (C), and cardiac death or rehospitalization (D) in patients with vs. without LVEF improvement (defined as  $\geq 10\%$ -points increase over baseline LVEF at 1 year) after TAVR.

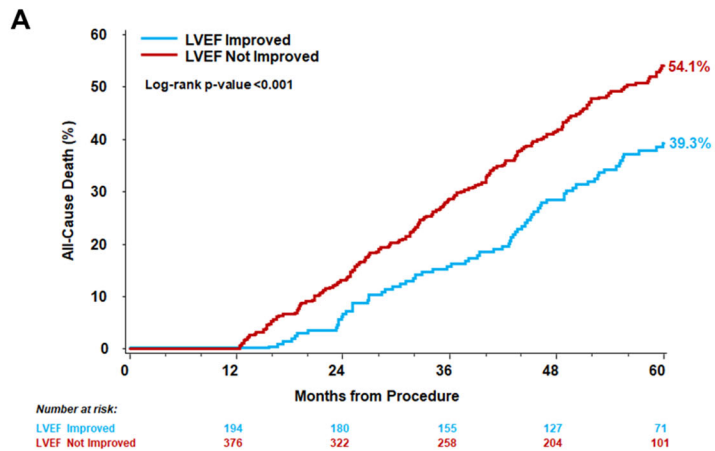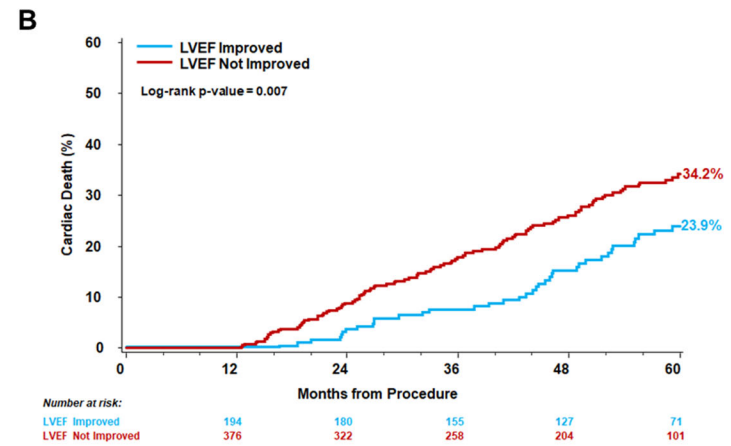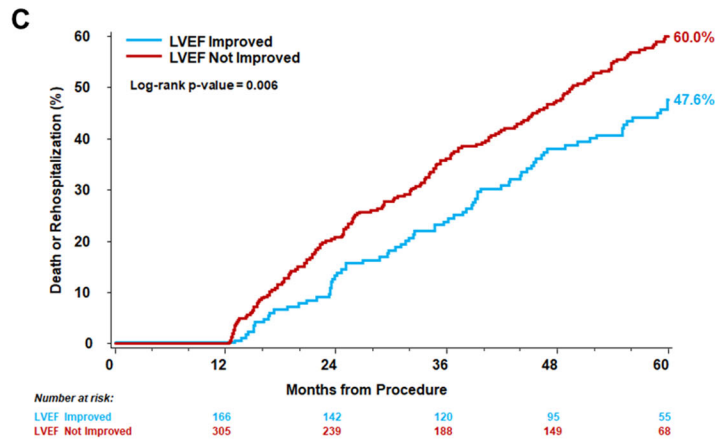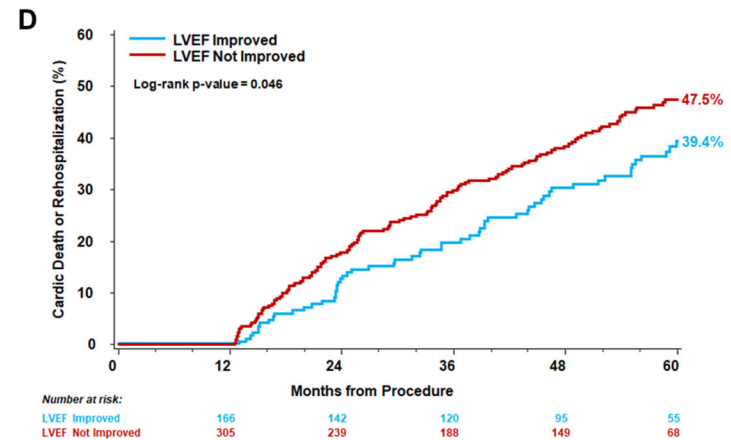



**eFigure 7. 5-Year Outcomes in Men and Women With vs. Without Early LVEF Improvement After TAVR**

Time-to-event curves of 5-year all-cause death (A), cardiac death (B), death or rehospitalization (C), and cardiac death or rehospitalization (D) in in men and women with vs. without LVEF improvement (defined as  $\geq 10\%$ -points increase over baseline LVEF at 30 days) after TAVR.

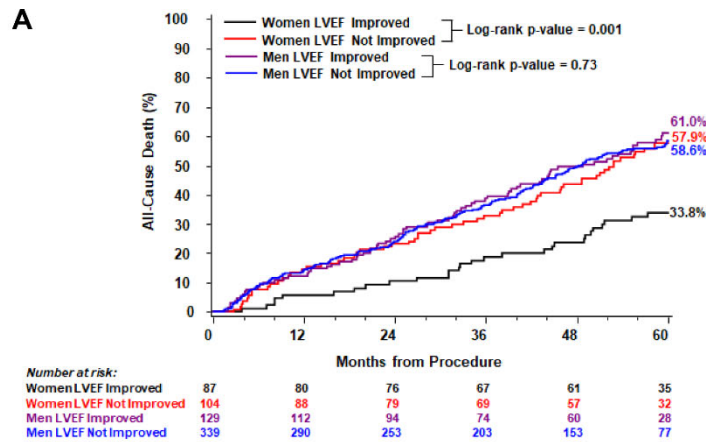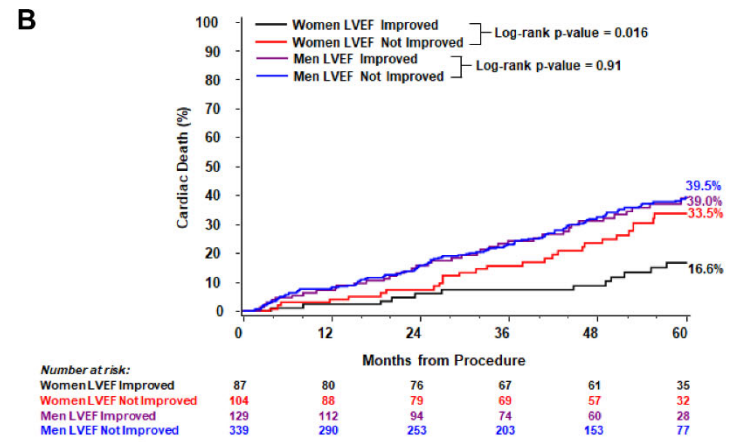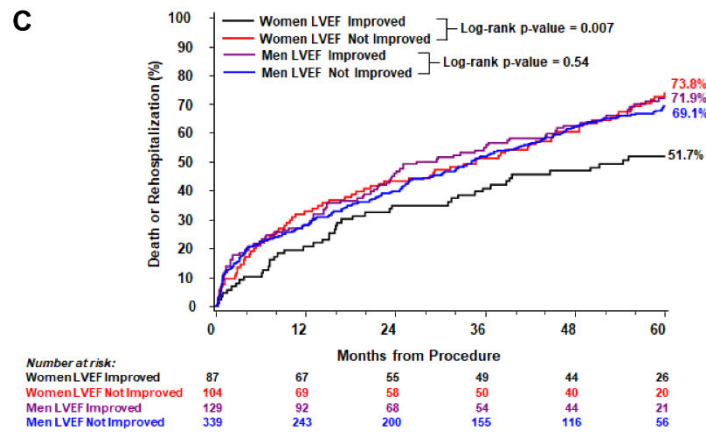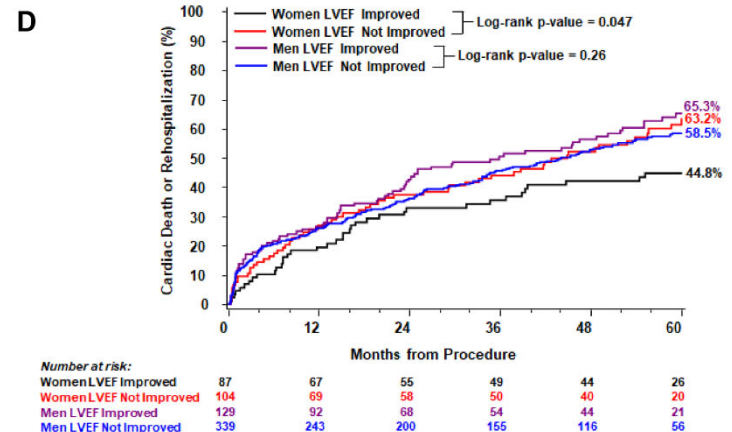

Supplement: jamacardiol-e222222-s001.pdf [file jamacardiol-e222222-s001.pdf]
